# Supplementary material for: The Role of Proton-Coupled Amino Acid Transporter 2 (SLC36A2) in Cold-Induced Thermogenesis of Mice
Source: MDPI journal article supplement (doi:10.3390/nu15163552), 2023-08-11
Supplement: s1 [file s1]

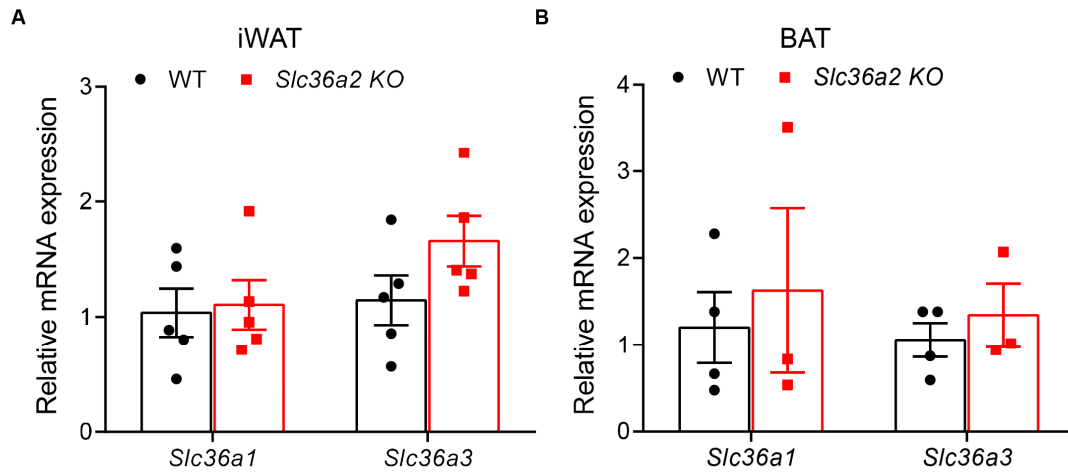

**Figure S1. (A,B)** Relative levels of *Slc36a1* and *Slc36a3* in iWAT (**A**) and BAT (**B**) WT and *Slc36a2* KO mice after cold-treatment.
